# Supplementary material for: Interaction of Isocitrate Lyase with Proteins Involved in the Energetic Metabolism in Paracoccidioides lutzii
Source: MDPI journal article supplement (doi:10.3390/jof6040309), 2020-11-23
Supplement: s1 [file s1]

**Supplementary Table 1** - The PDBs of relevant structures that interact with *PbICL* and their significance (C-score confidence and TM-score) used for decoys.

| Accession  | Protein name                             | PDB (decoy) | C-score* | TM-score** |
|------------|------------------------------------------|-------------|----------|------------|
| PAAG_01995 | fructose-bisphosphate aldolase           | 3QM3        | 1.02     | 0.81       |
| PAAG_02869 | phosphoglycerate kinase                  | 1QPG        | 1.85     | 0.98       |
| PAAG_06380 | pyruvate kinase                          | 1A3W        | 1.09     | 0.86       |
| PAAG_08468 | glyceraldehyde-3-phosphate dehydrogenase | 4O59        | 1.05     | 0.86       |
| PAAG_11169 | enolase                                  | 1EBG        | 1.66     | 0.94       |
| PAAG_08449 | malate dehydrogenase                     | 1MLD        | 1.02     | 0.83       |
| PAAG_04550 | 2-methylcitrate synthase                 | 5UQO        | 1.84     | 0.91       |
| PAAG_04559 | 2-methylcitrate dehydratase              | 5MVI        | 1.03     | -0.81      |
| PAAG_06309 | enoyl-CoA-hydratase                      | 3Q0J        | 1.06     | 0.82       |
| PAAG_08203 | phosphoenolpyruvate carboxykinase        | 1AQ2        | -2.06    | 0.47       |
| PAAG_05249 | alcohol dehydrogenase                    | 1O9J        | 1.85     | 0.98       |
| PAAG_08163 | fumarylacetoacetase                      | 4QKU        | -1.58    | 0.94       |
| PAAG_02633 | ribose-phosphate pyrophosphokinase       | 4LYG        | 0.99     | 0.56       |
| PAAG_04291 | nucleoside diphosphate kinase            | 6JOH        | 1.57     | 0.93       |
| PAAG_2633  | ribose-phosphate pyrophosphokinase       | 4LYG        | 1.09     | 0.78       |
| PAAG_03447 | acetyl-CoA acetyltransferase             | 6L2C        | -0.25    | 0.68       |

\* Estimation of the quality of predicted models; \*\* Structural similarity score to measure the accuracy of structure modeling.

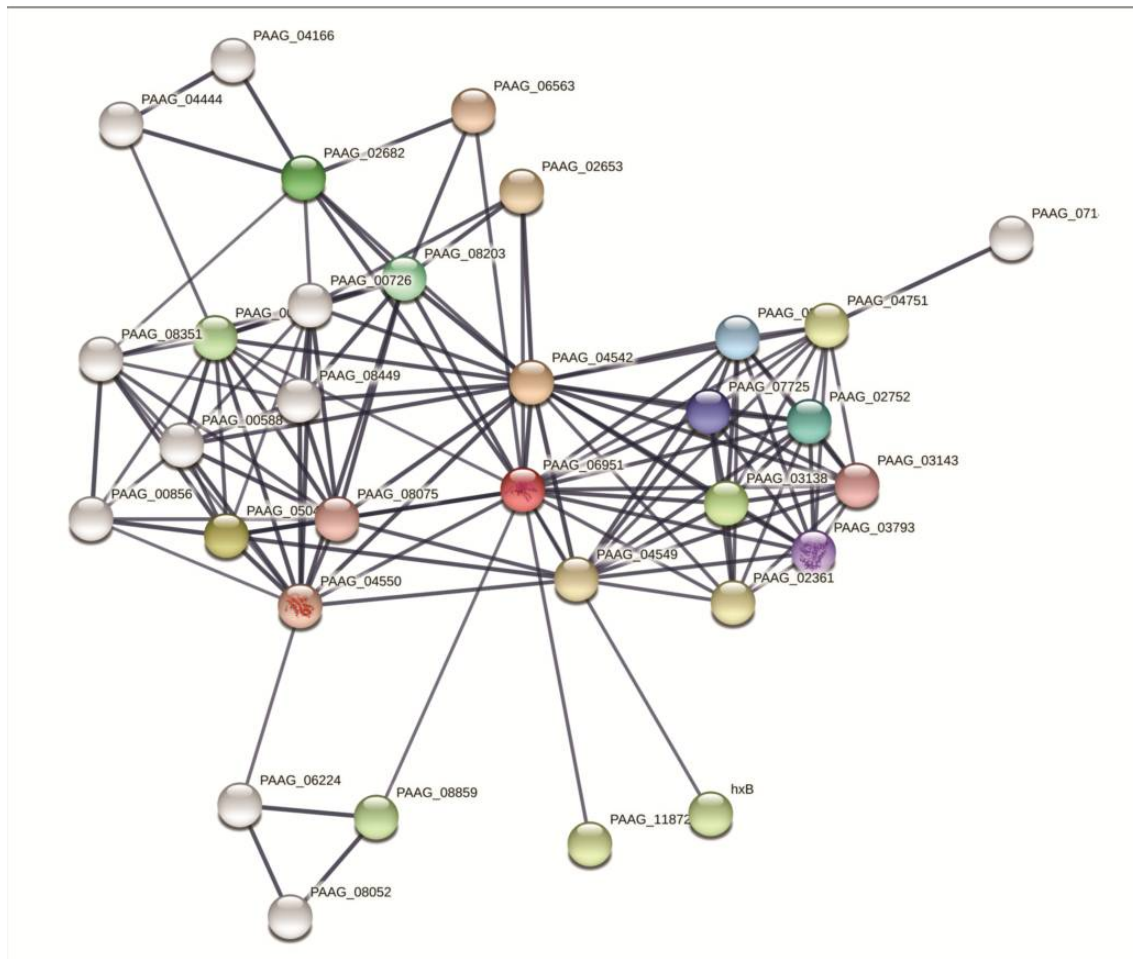

Figure S1, ICL interacting proteins according to STRING database. STRING database identified 31 *P. lutzi* ICL partners. The cut-off score selected was less stringent (0.6) in order to verify if the number of PPIs from the STRING database that corroborates our lab-bench result increases.
